# Supplementary material for: Colonization with Escherichia coli EC 25 protects neonatal rats from necrotizing enterocolitis
Source: PLoS One. 2017 Nov 30;12(11):e0188211. doi: 10.1371/journal.pone.0188211 (PMC5708813; doi:10.1371/journal.pone.0188211)
Supplement: S2 Data File — (XLSX) [file pone.0188211.s007.xlsx]

## Sheet: FHH & BF
					Individual Animal % Bacterial Distribution, ( Bacteria/Total Bacterial Load)																																									SDI(H)
Treatment	Source, animal#, litter		NEC Score	Total Bacterial Load	A %	B %	C %	D %	E %	F %	G %	H %	I %	J %	K %	L %	M %	N %	O %	P %	Q %	R %	S %	T %	U %	V %	W %	X %	Y %	Z %	A1 %	A2 %	A3 %	A4 %	A5 %	A6 %	A7 %	A8 %	A9 %	A10 %	A11 %	A12 %	A13 %	A14 %	% Total
FHH	CR1A	A1	0	23300000000000	100																																								100	0
FHH	CR2A	A2	0	43000000	100																																								100	0
FHH	CR3A	A3	0	180000000000000	100																																								100	0
FHH	CR4A	A5	0	8300000000000	100																																								100	0
FHH	CR5A	A6	0	3.5e+16	100																																								100	0
FHH	CR6A	A7	0	7800000000000	100																																								100	0
FHH	CR7A	A8	0	3300000000000	100																																								100	0
FHH	CR8A	A9	0	17000000000000	100																																								100	0
FHH	CR9B	C1	0	1030000000													100																												100	0
FHH	CR10B	C2	0	570000000													100																												100	0
FHH	CR11B	C3	0	960000000													100																												100	0
FHH	CR12B	C4	0	252000000													100																												100	0
FHH	CR13B	C6	0	63000000													100																												100	0
FHH	CR14B	C6	0	1370000000													100																												100	0
FHH	CR15B	C7	0	1430000000													100																												100	0
FHH	CR16B	C9	0	1180000000													100																												100	0
FHH	CR17C	G1	0	1390																		94					6																		100	0.23
FHH	CR18C	G2	0	15300																		98.6			1.2			0.2																	100	0.06
FHH	CR19C	G7	0	500																		100																							100	0
FHH	CR20C	G10	0	700																		25						35									40								100	1.1
FHH	CR21D	A4	1	143000000														100																											100	0
FHH	CR22D	B1	1	219000000														100																											100	0
FHH	CR23D	B4	1	30900000														100																											100	0
FHH	CR24D	B5	1	12500000000000														100																											100	0
FHH	CR25D	G9	1	2960																		64.9						33.1																2	100	0.73
FHH	CR26D	B2	2	246000000000														100																											100	0
FHH	CR27D	B3	2	370000000														100																											100	0
FHH	CR28D	C8	2	65000000												100																													100	0
BF	CR29D	BF 1	0	6415000			36			64																																			100	0.66
BF	CR30D	BF 2	0	163500000			35.8			64.2																																			100	0.66
BF	CR31D	BF 3	0	3100000						100																																			100	0
BF	CR32B	BB3 2	0	266500				58.5				40.9	0.6																																100	0.72
BF	CR33B	BB3 3	0	2955000				69.3				30.5	0.2																																100	0.62
BF	CR34A	E1	0	9710	16.98												15.4						34	1.47	13						3.8				2.17	2.32			10.86						100	1.83
BF	CR35A	E2	0	10300	7.2												26.42						53.2		7.48											1						4.7			100	1.26
BF	CR36A	E3	0	24900	7.1												20.5						18		0.8								6							0.6	47				100	1.46
BF	CR37A	E4	0	15300	52.65															23.4						23.1				0.7				0.15											100	1.06
BF	CR38A	E5	0	14400	21.5												30	24.6					21.6									2.2											0.1		100	1.45
BF	CR39C	E6	0	8850	26.9														67										1									5.1							100	0.82
BF	CR40C	E7	0	1400000															19.3					54	5.9						12				1.9		0.3		6.6						100	1.34
BF	CR41C	E8	0	3030	63.7														1.5	20						14.5								0.3											100	0.94
BF	CR42C	E9	0	90900															63.1	13.4	14				0.8					3.9			3.9					0.9							100	1.2

## Sheet: Post-EC25
					Individual Animal % Bacterial Distribution, (Bacteria/Total Bacterial Load)																																									SDI(H)
Treatment	Source, animal#, litter		NEC Score	Total Bacterial Load	A %	B %	D1%	E%	G%	H1	I1%	J%	K%	A15%	A16%	L %	M %	N %	O %	P %	Q %	R %	S %	T %	U %	V %	W %	X %	Y %	Z %	A1 %	A2 %	A3 %	A4 %	A5 %	A6 %	A7 %	A8 %	A9 %	A10 %	A11 %	A12 %	A13 %	A14 %	% Total
FHH	HL1A	Z2	0	7685000000			0.3	7.7		90.7				1.3																															100	0.33
FHH	HL2B	Z4	0	132400000				0.5		4.4					95.1																														100	0.23
FHH	HL3B	Z1	1	32500000				1.5		13.9					84.6																														100	0.5
FHH	HL4C	Z3	1	434500				0.2							99.8																														100	0
FHH	HL5B	Z6	2	140000000						50					50																														100	0.68
FHH	HL6C	FF1 1	2	550000								100																																	100	0
FHH	HL7D	FF1 3	2	33000				1.5		25.8				72.7																															100	0.63
FHH	HL8D	FF1 4	2	5120000				7.1		90.9				2																															100	0.35
FHH	HL9A	Z5	3	1515000000				7.9		16.59				75.6																															100.09	0.7
FHH	HL10A	Z7	3	72800000			7.7	5.1		10				77.2																															100	0.78
FHH	HL11D	FF1 2	3	2540000				41.1		19.5				39.4																															100	1.05
EC 25 10^6	HL12A	AA1 1	0	79500000	100																																								100	0
EC 25 10^6	HL13A	AA1 2	0	8000	100																																								100	0
EC 25 10^6	HL14B	AA1 4	0	20000	100																																								100	0
EC 25 10^6	HL15D	Y1 1	0	7200000	74.3			20.1			2.8	2.8																																	100	0.76
EC 25 10^6	HL16D	Y1 4	0	2795000000	93.7				6.3																																				100	0.23
EC 25 10^6	HL17A	AA1 3	1	70000	56.4	43.6																																							100	0.68
EC 25 10^6	HL18B	BB1 2	1	9450000	79.9		12.7	7.4																																					100	0.64
EC 25 10^6	HL19B	Y1 2	1	84500000	98.2			1.8																																					100	0.1
EC 25 10^6	HL20C	Y1 3	1	287500	100																																								100	0
EC 25 10^6	HL21D	FF2 2	1	75500000	80.8			19.2																																					100	0.49
EC 25 10^6	HL22C	BB1 1	2	275000	29.6		70.4																																						100	0.61
EC 25 10^6	HL23C	BB1 3	2	7000	35.7		64.3																																						100	0.66
EC 25 10^6	HL24D	FF2 1	2	154000000	53.9			46.1																																					100	0.69
EC 25 10^8	HL25A	AA2 1	0	750000	100																																								100	0
EC 25 10^8	HL26A	AA2 2	0	5980000	0.2		99.6		0.2																																				100	0
EC 25 10^8	HL27B	AA2 3	0	50000000	100																																								100	0
EC 25 10^8	HL28B	AA2 4	0	1220000	80.7		12.7	6.6																																					100	0.64
EC 25 10^8	HL29B	AA2 5	0	105500	66.8		33.2																																						100	0.64
EC 25 10^8	HL30C	BB2 1	0	392500	40.4		59.6																																						100	0.68
EC 25 10^8	HL31C	BB2 2	0	992000000000	98.9			1.1																																					100	0.06
EC 25 10^8	HL32D	BB2 3	0	5300000000	62.3			37.7																																					100	0.67
EC 25 10^8	HL33D	BB2 4	0	37000000000	95.4			4.6																																					100	0.2
EC 25 10^8	HL34D	*Y2 4	0	950000000	85		10	5																																					100	0.52
EC 25 10^8	HL35A	BB2 5	1	14150000000	87.6		12		0.4																																				100	0.36
EC 25 10^8	HL36C	Y2 2	1	38850000	87.8			12.2																																					100	0.36
EC 25 10^8	HL37D	CC3 3	1	11000	72.7		4.5	9.2		13.6																																			100	0.86
EC 25 10^8	HL38A	Y2 1	2	9530000000	97.3			2.7																																					100	0.14
EC 25 10^8	HL39C	Y2 3	2	155500000	88.4			11.3					0.3																																100	0.36
EC 25 10^8	HL40A	CC3 1	3	25500	21.6		68.6				9.8																																		100	0.82
EC 25 10^8	HL41B	CC3 2	3	8500	0			29.4		29.4	41.2																																		100	1.08

## Sheet: Bacterial Strain Identification
	NCBI Blast Database Query Results
ID	Most similar Bacterial Strain	Phylum	Max Score	Total Score	Query Cover	% Identity	Accession
A	E. coli EC25	Proteobacteria	1744	12166	0.99	0.99	NC_017634.1
B	Neisseria lactamica 020-06	Proteobacteria	1369	5472	0.99	0.99	NC_004668.1
C	Stenotrophomonas maltophilia strain K279a	Proteobacteria	1375	5466	0.98	0.89	NC_010943.1
D	Enterococcus faecalis V583 chromosome	Firmicutes	1777	7104	0.96	0.99	NC_004668.1
E	Enterococcus faecium DO chromosome	Firmicutes	1568	9350	0.96	0.95	NC_017960.1
F	Micrococcus sp. A7	Actinobacteria	2510	5044	0.99	0.99	AM235879.2
G	Micrococcus luteus NCTC 2665	Actinobacteria	1888	3798	0.96	0.98	NC_012803.1
H	Staphylococcus lugdunensis HKU09-01	Firmicutes	2843	6911	0.97	0.98	NC_013893.1
I	Staphylococcus carnosus subsp. carnosus TM300	Firmicutes	2872	14307	0.96	0.98	NC_012121.1
J	Bacillus megaterium DSM 319	Firmicutes	2817	13806	0.95	0.96	NC_014103.1
K	Bacillus amyloliquefaciens subsp. plantarum str. FZB42	Firmicutes	2872	26813	0.92	0.95	NC_009725.1
L	Lactobacillus ruminis ATCC 27782	Firmicutes	2577	2874	0.98	0.99	NR_102839.1
M	Escherichia sp. 253b	Proteobacteria	1637	11394	1	0.99	AY082448.1
N	Escherichia coli strain MMG 3b	Proteobacteria	1512	2712	0.95	0.92	JN162443.1
O	Escherichia coli strain Y31	Proteobacteria	1762	2760	0.97	0.99	JN578646.1
P	Escherichia coli strain MMG 109M	Proteobacteria	2303	2497	0.95	0.97	JN162446.1
Q	Escherichia coli strain P33	Proteobacteria	2451	2754	0.97	0.99	JN578644.1
R	Escherichia coli strain FUA1242	Proteobacteria	1773	12384	0.99	0.98	HQ169124.1
S	Shigella sp 121406	Proteobacteria	1784	12494	0.99	0.98	EU723876.1
T	Shigella sp. 1.5-11	Proteobacteria	1796	12472	0.99	0.99	JN221511.1
U	Staphylococcus sp MIS6	Firmicutes	1983	2261	0.95	0.97	JN660069.1
V	Shigella flexneri 2a str. 301 chromosome	Proteobacteria	1784	12446	0.99	0.98	NC_004337.2
W	Bacillus sp. SGb107	Firmicutes	1303	15514	0.87	0.91	HQ224595.1
X	Enterococcus faecalis strain FUA3372	Firmicutes	1635	9801	0.92	0.95	JN102567.1
Y	Staphylococcus haemolyticus strain 6R-J-5	Firmicutes	2460	2604	0.99	0.99	EU379304.1
Z	Escherichia coli str. K-12 substr. MG1655, complete genome	Proteobacteria	1790	12472	0.99	0.98	NC_000913.3
A1	Staphylococcus haemolyticus strain LEH2-2A	Firmicutes	2760	2767	0.99	0.98	JN644589.1
A2	Staphylococcus sp KL8	Firmicutes	2589	2682	0.98	0.99	JN695710.1
A3	Staphylococcus cohnii strain FUA2059	Firmicutes	2601	2704	0.97	0.99	HQ169121.1
A4	Staphylococcus sp WB21-20	Firmicutes	1775	2457	0.93	0.96	GU595377.1
A5	Enterococcus hirae ATCC 9790	Firmicutes	1565	9317	0.96	0.95	NC_018081.1
A6	Uncultured bacterium clone ncd2029a03c1	n/a	1284	7849	0.87	0.89	JF181149
A7	Enterococcus casseliflavus EC20	Firmicutes	1574	7872	0.96	0.96	NC_020995.1
A8	Uncultured Bacterium Clone nby301b07c1	n/a	2529	2534	0.99	0.99	HM815866.1
A9	Uncultured bacterium RP_3aaa03a09	n/a	2556	2590	0.96	0.98	EU471164.1
A10	Uncultured bacterium clone aab39e03	n/a	2706	2723	0.99	0.99	DQ818904.1
A11	Uncultured bacterium clone aaa53d01	n/a	2730	2741	0.97	0.99	DQ818115.1
A12	Uncultured Bacterium Clone nbw919e12c1	n/a	2037	2518	0.95	0.93	GQ028733.1
A13	Escherichia coli O104:H4 str. 2011C-3493 chromosomE	Proteobacteria	1696	11831	0.99	0.97	NC_018658.1
A14	Bacillus pseudofirmus OF4	Firmicutes	1269	8849	0.87	0.9	NC_013791.2
D1	Enterococcus faecalis	Firmicutes	1627	2108	0.89	0.93	NC_004668.1
H1	Staphylococcus sp.
I1	Staphylococcus sp.
A15	E. coli
A16	E. coli

## Sheet: Bacterial Strain by Phylum
	NCBI Blast Database Query Results
	Most similar Bacterial Strain	Phylum
F	Micrococcus sp. A7	Actinobacteria
G	Micrococcus luteus NCTC 2665	Actinobacteria
D	Enterococcus faecalis V583 chromosome	Firmicutes
E	Enterococcus faecium DO chromosome	Firmicutes
H	Staphylococcus lugdunensis HKU09-01	Firmicutes
I	Staphylococcus carnosus subsp. carnosus TM300	Firmicutes
J	Bacillus megaterium DSM 319	Firmicutes
K	Bacillus amyloliquefaciens subsp. plantarum str. FZB42	Firmicutes
L	Lactobacillus ruminis ATCC 27782	Firmicutes
U	Staphylococcus sp MIS6	Firmicutes
W	Bacillus sp. SGb107	Firmicutes
X	Enterococcus faecalis strain FUA3372	Firmicutes
Y	Staphylococcus haemolyticus strain 6R-J-5	Firmicutes
A1	Staphylococcus haemolyticus strain LEH2-2A	Firmicutes
A2	Staphylococcus sp KL8	Firmicutes
A3	Staphylococcus cohnii strain FUA2059	Firmicutes
A4	Staphylococcus sp WB21-20	Firmicutes
A5	Enterococcus hirae ATCC 9790, complete genome	Firmicutes
A7	Enterococcus casseliflavus EC20, complete genome	Firmicutes
A14	Bacillus pseudofirmus OF4	Firmicutes
A	Escherichia coli O83:H1 str. NRG 857C chromosome	Proteobacteria
B	Neisseria lactamica 020-06	Proteobacteria
C	Stenotrophomonas maltophilia strain K279a	Proteobacteria
M	Escherichia sp. 253b	Proteobacteria
N	Escherichia coli strain MMG 3b	Proteobacteria
O	Escherichia coli strain Y31	Proteobacteria
P	Escherichia coli strain MMG 109M	Proteobacteria
Q	Escherichia coli strain P33	Proteobacteria
R	Escherichia coli strain FUA1242	Proteobacteria
S	Shigella sp 121406	Proteobacteria
T	Shigella sp. 1.5-11	Proteobacteria
V	Shigella flexneri 2a str. 301 chromosome, complete genome	Proteobacteria
Z	Escherichia coli str. K-12 substr. MG1655, complete genome	Proteobacteria
A13	Escherichia coli O104:H4 str. 2011C-3493 chromosome, complete genome	Proteobacteria
A6	Uncultured bacterium clone ncd2029a03c1	n/a
A8	Uncultured Bacterium Clone nby301b07c1	n/a
A9	Uncultured bacterium RP_3aaa03a09	n/a
A10	Uncultured bacterium clone aab39e03	n/a
A11	Uncultured bacterium clone aaa53d01	n/a
A12	Uncultured Bacterium Clone nbw919e12c1	n/a
